# Supplementary material for: Discovery of peptidylarginine deiminase-4 substrates by protein array: antagonistic citrullination and methylation of human ribosomal protein S2
Source: Royal Society of Chemistry journal article supplement (doi:10.1039/c1mb05089c), 2011-01-07
Supplement: c1mb05089c.pdf [file c1mb05089c.pdf]

Supplementary Information

Discovery of Peptidylarginine Deiminase-4 Substrates by Protein Array:  
Antagonistic Citrullination and Methylation of Human Ribosomal Protein S2

*Qin Guo, Mark T. Bedford and Walter Fast\**

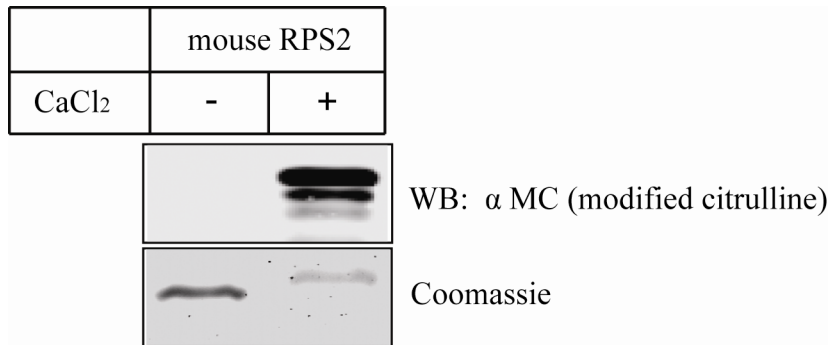

**Figure S1. PAD4 citrullinates mouse RPS2 (mRPS2) *in vitro*.** Purified mRPS2 was treated by PAD4 with or without 2 mM CaCl<sub>2</sub>. Conditions are the same as in Figure 2a.

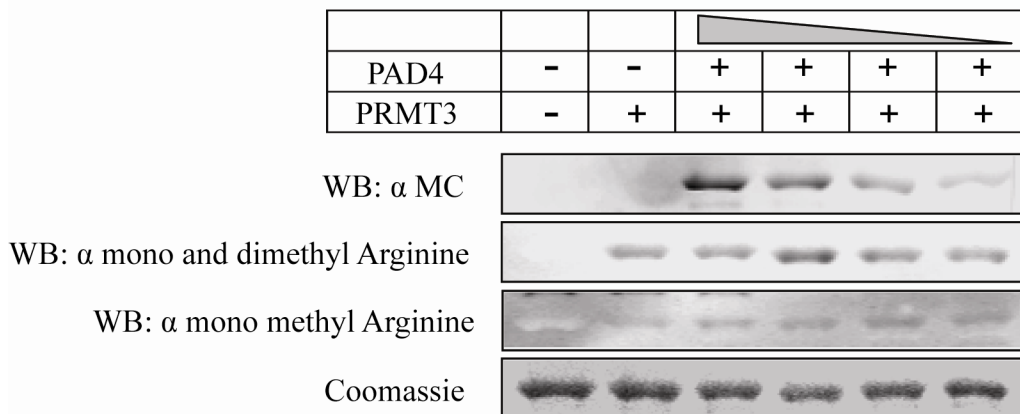

**Figure S2. Analysis of methyl content in deiminated RPS2 domains.** Purified MBP-GAR was first methylated by PRMT3, followed by the treatment of PAD4. The conditions were the same as that of Figure 4, except for varying PAD4 concentrations (13.75 μg/ml, 2.75 μg/ml, 0.55 μg/ml and 0.11 μg/ml, for lanes 3 to 6, respectively). An antibody specific to monomethyl arginine was used to probe for any monomethyl MBP-GAR (third panel from the top).
